# Supplementary material for: Synergistic warming- and catchment-driven mid-Holocene cyanobacterial development: Pigment evidence from shallow eutrophic Lake Mayinghai on the Chinese Loess Plateau
Source: Frontiers journal article supplement (doi:10.3389/feart.2022.984420), 2023-01-06
Supplement: Data_Sheet_1.XLSX [file Data_Sheet_1.XLSX]

## Sheet: age
Laboratory number	Depth (cm)	Dating materials	δ13C (‰)	Radiocarbon age (14C yr BP)	Calendar age (cal yr BP)
451836	81.5	plant macrofossil	-27.3	170±30	156±86
451837	179.5	plant macrofossil	-28.5	110±30	129±77
451839	469.3	plant macrofossil	-26.1	360±30	405±55
451840	585.6	plant macrofossil	-24	530±30	549±32
451841	700.6	plant macrofossil	-11.8	1410±30	1319±19
492682	730.6	plant macrofossil	-30.2	1070±30	981±41
492683	818.2	charcoal	-24.9	2160±30	2176±83
451842	877	plant macrofossil	-28.7	2260±30	2250±60
492684	920.2	plant macrofossil	-25.4	2800±30	2901±43
451843	964.9	plant macrofossil	-25.9	3760±30	4121±63
492685	1010.5	plant macrofossil	-26.2	4290±30	4858±31
451844	1046.8	plant macrofossil	-25.6	3680±30	4019±54
451845	1076.3	plant macrofossil	-22.1	3750±30	4104±63
492686	1143.5	plant macrofossil	-	6020±40	6861±59
492687	1199.9	charcoal	-	6610±30	7500±41
492688	1260.1	plant macrofossil	-	7910±40	8759±108
451847	1305.6	plant macrofossil	-27.2	8200±30	9153±76
492689	1351	plant macrofossil	-	8690±40	9640±69
494478	1408.9	plant macrofossil	-	9250±30	10416±68
492691	1446.1	plant macrofossil	-24.4	9560±40	10915±114
