# Supplementary material for: Synergistic warming- and catchment-driven mid-Holocene cyanobacterial development: Pigment evidence from shallow eutrophic Lake Mayinghai on the Chinese Loess Plateau
Source: Frontiers journal article supplement (doi:10.3389/feart.2022.984420), 2023-01-06
Supplement: Data_Sheet_2.XLSX [file Data_Sheet_2.XLSX]

## Sheet: nmol pigment per g TOC
Depth (cm)	Age (cal yr BP)	Chl a+echinenone	Pheophytin a	(Chl a+echinenone)+Pheophytin a	β-Carotene	β-Carotene/(Chl a+echinenone)	Pheophytin b	Lutein+zeaxanthin	Canthaxanthin	Fucoxanthin and its derivative	Alloxanthin
1.98675	-58.142	113.012	163.845	276.856	6.18766	0.0547523	246.818	143.909	41.3628	85.8154	89.872
7.28477	-46.601	124.43	245.44	369.87	22.217	0.17855	402.318	132.279	35.8491	119.486	82.7865
12.5828	-35.109	19.1431	114.684	133.827	0	0	156.701	56.5423	10.9177	48.012	32.7251
17.8808	-23.704	95.8056	175.99	271.796	6.66652	0.0695838	270.193	119.938	31.0957	80.6977	74.3152
23.1788	-12.422	35.6263	107.291	142.917	0	0	161.602	74.4766	8.14544	21.5652	36.662
28.4768	-1.3	24.1455	0	24.1455	15.9145	0.659108	0	75.0097	4.17389	16.4141	36.9887
33.7748	9.624	13.5771	63.1221	76.6992	7.40514	0.545415	195.133	47.059	4.85536	42.4488	21.2961
44.3709	30.734	0	62.1047	62.1047	17.158	0	175.865	54.7123	0	0	25.1192
54.9669	50.612	0	0	0	0	0	0	71.5966	0	0	21.0667
76.1589	85.497	10.0284	25.2574	35.2857	23.4044	2.33382	231.207	41.8119	0	4.76557	18.0099
97.351	112.231	0	0	0	0	0	0	28.9407	0	0	15.6597
118.543	131.39	0	0	0	0	0	0	28.824	0	0	19.8821
139.735	145.195	6.79364	37.2827	44.0763	3.23088	0.475574	128.616	40.6733	0	0	13.1383
160.927	155.596	0	0	0	0	0	0	18.5778	0	0	5.81164
182.119	164.651	9.46846	48.2656	57.7341	11.0327	1.16521	122.908	52.1422	0	0	18.1257
203.049	173.816	12.1571	84.9411	97.0982	1.40508	0.115577	235.226	56.4256	6.05093	12.7563	33.2765
222.561	182.89	12.6708	60.122	72.7928	5.92899	0.467927	220.711	59.008	5.19509	6.83603	23.0142
242.073	192.438	8.95124	43.4991	52.4504	15.9458	1.7814	115.359	42.056	0	0	20.4628
261.585	202.566	0	0	0	0	0	0	27.7315	0	0	29.4443
281.098	213.332	0	22.2783	22.2783	5.22715	0	133.58	24.5954	0	0	16.9984
300.61	224.796	0	0	0	6.01286	0	137.643	32.6733	0	27.0675	27.9309
320.122	237.017	0	0	0	3.95534	0	0	22.1044	0	0	19.7402
339.634	250.055	0	0	0	0	0	0	21.2994	0	0	20.8208
359.146	263.969	0	0	0	1.56229	0	76.566	22.2383	0	0	11.8999
378.659	278.897	0	0	0	1.76364	0	82.1539	23.6106	0	0	11.6078
398.171	294.746	0	0	0	0	0	92.1392	31.4176	0	0	10.0475
414.663	308.978	0	0	0	0	0	0	61.2599	0	0	41.4172
430.843	323.628	0	0	0	0	0	0	13.7208	0	0	10.1514
447.022	339.163	0	0	0	0	0	0	16.1104	0	0	7.65126
463.202	355.527	0	0	0	0	0	0	22.9275	0	0	15.7749
479.382	372.813	0	0	0	0	0	0	6.893	0	0	3.72823
495.562	391.867	0	0	0	0	0	0	18.0268	0	0	13.2554
511.742	413.939	0	0	0	0	0	0	4.63858	0	0	0
527.921	440.708	6.97055	34.2326	41.2032	12.8174	1.83879	72.3323	25.2255	0	0	16.0713
544.101	473.459	0	0	0	3.17938	0	105.741	51.3462	0	0	34.4534
560.281	513.601	0	0	0	0	0	0	22.8844	0	0	10.5292
576.461	562.548	19.3796	30.363	49.7426	26.4473	1.36469	112.509	46.1117	2.05411	0	25.5714
592.64	621.255	15.6084	66.8139	82.4223	21.5459	1.3804	186.783	52.0718	7.67739	6.25911	23.1822
600.73	654.576	21.5869	74.0911	95.678	21.5069	0.996292	166.12	43.1395	10.8508	11.7428	26.6681
608.82	690.029	49.2695	65.7933	115.063	19.9877	0.405681	144.575	53.1305	11.4466	11.3601	31.0723
616.91	727.284	20.0053	68.581	88.5864	37.755	1.88725	151.073	49.0183	9.10282	9.8414	29.1457
625	766.007	19.7846	86.7097	106.494	38.4054	1.94118	224.119	107.564	8.21778	7.58045	38.731
633.09	805.867	0	0	0	6.30724	0	145.595	19.3771	0	0	25.7048
641.18	846.532	19.5387	193.404	212.943	16.6229	0.850769	350.473	60.9546	10.6857	9.27924	37.3924
649.27	887.67	0	0	0	0	0	0	11.4417	0	0	4.64801
657.36	928.948	0	0	0	0	0	0	9.18937	0	0	5.22088
665.449	969.53	0	0	0	0	0	0	10.6473	0	0	11.27
674.2	1013.57	0	0	0	0	0	0	12.5599	0	0	13.4619
683.8	1060.42	10.15	14.4212	24.5712	14.9951	1.47735	94.0787	47.8355	10.7896	0	30.2131
693.4	1105.48	40.9264	50.6946	91.6209	18.2381	0.445633	117.607	59.727	37.4033	6.77055	44.6422
698.2	1127.17	70.1289	34.148	104.277	59.9189	0.854412	117.286	67.1289	47.7165	5.06987	24.0735
703	1148.21	28.9451	33.037	61.9821	17.6673	0.610374	85.7039	70.4012	14.9705	13.0034	26.2407
707.8	1168.75	37.9383	47.9087	85.8469	36.3752	0.9588	134.432	74.4435	32.3672	6.22063	35.2184
712.6	1189.15	18.7004	38.372	57.0724	11.7844	0.630166	127.388	69.4324	21.0456	9.49298	24.6763
717.4	1209.77	32.794	64.6545	97.4485	29.5455	0.900942	122.752	85.5833	30.0352	10.7836	39.2482
722.2	1230.97	32.9722	58.4355	91.4077	26.0202	0.789157	114.141	96.2166	20.0059	7.51268	52.7512
727	1253.12	41.2671	65.2788	106.546	45.636	1.10587	131.912	108.934	21.6328	13.4344	41.1107
731.8	1276.58	25.7051	44.2822	69.9872	22.0618	0.858266	98.5618	105.076	16.2084	16.6487	40.8638
736.6	1301.57	42.1978	85.6145	127.812	64.9609	1.53944	202.277	146.193	21.627	16.1561	38.8443
741.4	1328.08	40.3583	55.1064	95.4648	32.3239	0.800923	116.939	211.997	30.2059	10.8055	67.0465
746.2	1356.04	58.2309	90.6918	148.923	73.5457	1.263	281.918	225.156	13.2955	7.28753	85.7526
751	1385.38	36.0709	40.2744	76.3454	26.6896	0.739918	89.0274	214.399	29.5079	10.8292	60.885
755.8	1416.06	44.7211	85.5904	130.312	61.3606	1.37207	200.59	217.606	27.6935	7.84107	69.5447
760.6	1448	21.7415	29.9044	51.6458	10.8826	0.500547	46.7961	137.433	16.1435	11.3439	46.6198
765.4	1481.16	47.7791	110.244	158.024	51.8789	1.08581	243.208	159.935	22.0482	13.9378	51.3147
770.2	1515.47	55.6177	94.6489	150.267	71.1513	1.27929	135.248	184.413	24.025	18.2101	67.8723
775	1550.88	54.9421	107.468	162.41	80.5262	1.46566	217.42	182.141	22.6155	19.4009	68.6954
779.8	1587.32	28.7942	56.7859	85.5801	19.9135	0.691581	102.593	129.66	9.66168	9.08652	35.2787
784.6	1624.73	28.5315	55.6751	84.2066	16.6585	0.583863	92.1129	152.326	12.6781	14.7414	41.4522
789.4	1663.06	31.7142	110.01	141.724	43.6554	1.37653	219.789	138.687	11.0953	13.0036	46.2605
794.2	1702.24	68.0093	204.938	272.948	124.778	1.83472	378.586	224.624	33.1324	8.36446	110.724
799	1742.22	55.7714	135.579	191.351	64.0912	1.14918	181.176	213.424	33.7769	27.6245	107.425
803.8	1782.94	82.9906	253.488	336.478	144.965	1.74676	444.449	221.505	32.7159	23.913	80.2506
808.6	1824.33	43.6938	84.4765	128.17	17.4336	0.398995	123.99	128.068	17.0593	9.78978	47.6465
813.4	1866.35	44.6732	94.0455	138.719	24.2998	0.543946	168.302	105.99	4.14951	14.4899	46.9161
823	1952.02	25.876	40.1769	66.0529	18.6816	0.721965	100.901	79.3624	13.3408	8.23671	47.5376
827.8	1995.79	31.4046	86.9892	118.394	24.788	0.789312	187.162	88.9296	14.1237	9.86502	37.2092
832.6	2040.37	23.9755	77.4828	101.458	19.6258	0.818579	179.939	53.1401	11.545	11.9253	32.5449
837.4	2085.94	21.3034	53.3197	74.6231	9.53757	0.447702	101.729	85.9942	11.4756	11.6477	29.4585
842.2	2132.64	64.0187	268.851	332.87	31.5401	0.49267	451.803	86.3186	15.6821	12.3047	33.2602
847	2180.65	33.1694	63.4301	96.5995	40.8904	1.23278	132.548	87.453	15.3307	14.7328	29.4124
851.8	2230.11	27.3657	84.2239	111.59	27.4086	1.00157	243.152	78.0088	14.0807	14.3291	24.5311
856.6	2281.2	25.0127	63.2975	88.3102	9.5776	0.38291	135.386	85.9464	11.4206	25.4169	30.3624
861.4	2334.07	34.2605	80.2843	114.545	27.2843	0.796376	215.99	111.909	15.6036	10.824	41.0789
866.2	2388.87	24.7047	63.0044	87.7092	16.8583	0.682391	162.086	102.094	10.4298	6.99587	24.5062
871	2445.78	16.6448	45.3823	62.0271	14.1989	0.853053	125.592	59.321	6.85945	6.43602	16.5213
875.8	2504.95	47.2642	65.6056	112.87	23.392	0.494919	98.6889	136.737	18.9381	17.7423	48.3507
880.6	2566.53	59.8468	168.633	228.479	64.0633	1.07045	320.109	164.969	27.0036	18.8366	54.1055
885.4	2630.45	69.6695	118.393	188.063	74.1547	1.06438	159.352	158.133	27.1885	18.5402	50.7671
890.2	2696.61	78.1857	148.087	226.273	96.5329	1.23466	227.255	177.554	26.7851	19.2841	69.1075
895	2764.84	54.8754	81.8305	136.706	30.0541	0.547678	54.9285	187.157	14.4375	17.4754	63.1748
899.8	2835.01	76.9609	151.077	228.038	87.9629	1.14295	56.702	215.982	29.1503	21.4413	69.3202
904.6	2907	54.0601	99.7973	153.857	37.1575	0.687338	126.834	177.796	24.3391	10.7545	60.4729
909.4	2980.65	148.043	83.6592	231.702	108.359	0.731946	108.612	122.132	17.4992	14.8055	69.0605
914.2	3055.83	56.9694	83.6192	140.589	61.3014	1.07604	91.3714	195.511	18.1279	7.72461	73.0465
919	3132.41	43.3994	80.4481	123.847	12.6875	0.292342	83.7304	165.507	11.7907	9.78224	64.8278
923.8	3210.22	58.6926	82.7634	141.456	35.7333	0.60882	87.473	148.234	20.6149	10.2099	73.3259
928.6	3288.95	57.4427	133.507	190.95	35.4932	0.617889	228.591	152.933	17.6569	10.5089	70.8282
933.4	3368.2	62.6288	149.967	212.596	29.4726	0.470592	0	139.094	13.6068	3.86988	62.0898
938.2	3447.58	37.3055	305.923	343.228	4.29395	0.115102	87.469	119.858	16.8023	16.2472	54.4728
943.358	3533.25	75.054	101.78	176.834	72.5511	0.966652	134.049	153.582	15.1912	12.0209	70.9077
948.731	3619.72	102.058	121.941	223.998	108.805	1.06611	190.397	166.854	27.1312	16.3443	93.1032
954.104	3706.37	73.2979	81.3655	154.663	45.0744	0.614948	98.993	158.091	13.8001	15.0161	80.4502
959.478	3791	86.3534	126.582	212.936	64.3704	0.74543	187.833	158.372	18.5616	23.5235	72.2251
964.851	3873.05	91.0166	87.0182	178.035	58.9457	0.647637	90.4845	169.838	14.6983	22.4509	68.1616
970.224	3950.57	113.468	172.887	286.355	135.237	1.19185	262.332	182.429	16.9168	21.6295	85.3016
975.597	4026.23	98.9365	92.0638	191	65.1966	0.658974	104.741	165.036	17.4292	17.315	78.039
980.97	4098.31	116.01	75.5869	191.597	66.1099	0.569866	150.386	188.235	27.828	27.8508	91.1772
986.343	4165.39	77.5244	78.9757	156.5	65.7675	0.848345	87.6676	136.529	11.6695	13.9268	59.1331
991.716	4229.77	82.4626	130.852	213.315	80.5743	0.977102	195.667	145.517	18.9	13.5891	51.4892
997.09	4289.96	96.9312	127.388	224.319	113.815	1.17418	159.81	163.683	12.075	14.153	60.0483
1002.46	4345.73	79.7315	135.985	215.716	85.3411	1.07036	226.14	156.848	20.3218	0	62.4276
1007.84	4395.99	78.4425	90.4673	168.91	59.5915	0.759683	108.193	153.312	13.8498	17.0259	69.5433
1013.21	4442.44	74.5193	54.501	129.02	51.3108	0.688557	88.9104	138.25	22.324	21.7685	69.8765
1018.58	4484.69	81.7835	104.989	186.773	95.6003	1.16894	116.655	179.415	26.2988	17.4246	93.4111
1023.96	4524.11	132.952	236.174	369.126	153.175	1.15211	552.865	187.001	28.3813	21.1582	107.238
1029.33	4561.42	94.4362	111.381	205.817	97.1098	1.02831	121.545	206.037	30.1198	20.4862	114.611
1034.7	4599.39	94.7771	112.081	206.858	128.629	1.35717	109.298	193.169	29.0044	15.8723	104.859
1040.07	4638.72	118.463	138.525	256.988	129.856	1.09618	173.505	221.689	35.5512	18.4009	109.644
1045.45	4680	101.929	100.84	202.769	50.6661	0.497075	122.498	212.455	32.6652	17.8961	94.0193
1050.82	4726.11	104.945	120.119	225.065	96.2154	0.916813	148.744	217.613	35.447	17.4777	107.652
1056.19	4777.11	150.732	181.977	332.709	147.665	0.979654	304.315	197.655	32.8545	18.2305	102.735
1061.57	4833.51	137.5	125.22	262.719	97.7382	0.710826	149.999	218.236	49.1318	3.7083	222.661
1066.94	4894.63	135.923	88.8763	224.8	70.8861	0.521516	86.6192	166.709	27.6256	15.3914	127.637
1072.31	4963.27	183.142	93.3093	276.451	58.842	0.321292	107.842	187.272	29.4643	17.4985	153.559
1077.69	5038.87	166.219	143.969	310.188	113.231	0.681217	259.021	205.913	30.9956	20.5218	147.007
1083.06	5121.55	178.128	108.416	286.544	84.1962	0.472672	129.645	207.426	30.8972	80.5282	179.545
1088.43	5209.01	194.475	174.304	368.78	127.397	0.655083	299.582	198.559	25.8038	20.4662	144.722
1093.81	5303.89	221.989	130.695	352.684	127.799	0.5757	185.708	220.299	29.7117	18.614	153.652
1099.18	5403.93	244.668	161.165	405.832	124.632	0.509393	280.389	232.485	36.2258	27.1289	198.693
1104.55	5508.46	148.107	0	148.107	14.8559	0.100306	0	126.952	14.7411	28.5114	137.336
1109.93	5614.77	395.72	187.679	583.399	136.339	0.344535	257.037	237.734	36.9028	37.231	190.17
1115.3	5726.21	204.553	92.8905	297.443	68.6057	0.335394	144.816	146.965	12.3406	16.2406	109.517
1120.67	5840.13	234.204	99.002	333.206	74.3763	0.317571	155.335	155.974	24.1371	15.9595	103.467
1126.04	5953.72	257.576	76.9567	334.532	53.3986	0.207312	98.9219	184.96	27.6596	19.1944	103.076
1131.42	6070.58	339.992	77.4428	417.435	98.4497	0.289564	171.213	166.295	23.342	21.5505	102.915
1136.79	6187.93	166.808	0	166.808	14.274	0.0855714	46.6271	149.822	22.9419	19.9861	108.544
1142.16	6305.1	286.319	82.3034	368.623	58.3036	0.203631	118.079	186.207	30.5864	28.9329	132.168
1147.54	6419.3	387.757	80.7894	468.547	46.7599	0.120591	108.577	172.854	32.9674	16.1802	128.177
1152.91	6534.61	429.748	157.069	586.817	118.057	0.274711	252.896	179.355	30.3289	20.7733	118.377
1158.28	6648.79	254.303	115.858	370.161	32.8937	0.129348	129.515	91.3192	20.6854	49.4411	84.4571
1163.66	6761.79	242.843	141.068	383.911	26.2964	0.108286	132.721	108.776	21.9397	46.4473	98.405
1169.03	6871.49	220.29	43.5425	263.833	16.1078	0.0731206	107.473	120.463	21.0539	52.1096	103.946
1174.4	6981.97	228.144	153.421	381.565	58.0396	0.254399	325.661	124.999	18.737	41.3706	110.51
1179.78	7091.1	92.6151	66.237	158.852	8.33241	0.0899682	129.864	96.3115	7.43015	36.079	84.366
1185.15	7196.82	88.9033	64.9627	153.866	9.30523	0.104667	104.356	80.3791	15.045	24.6101	63.6298
1190.52	7303.08	148.779	108.954	257.733	54.0076	0.363006	142.662	119.13	20.0213	22.42	88.7713
1195.9	7407.81	161.154	114.783	275.936	110.507	0.685724	183.157	192.501	0	34.6317	137.049
1201.27	7510.94	191.923	117.14	309.064	109.906	0.572657	215.773	252.712	72.6856	59.4141	148.128
1206.64	7610.56	158.444	153.413	311.857	176.48	1.11383	281.657	305.457	64.319	43.4267	191.938
1211.55	7701.22	217.513	54.1701	271.683	75.5242	0.347217	43.034	171.708	27.2258	16.5198	95.9431
1215.68	7777.82	187.676	85.5387	273.214	100.533	0.535673	92.7782	198.74	28.1656	17.0032	118.314
1219.82	7851.58	199.41	119.88	319.29	135.665	0.680331	181.879	180.428	30.7302	20.097	114.046
1223.95	7924.32	134.382	95.408	229.79	69.463	0.516907	93.2368	182.653	33.4014	17.6412	121.552
1228.08	7997.78	146.66	85.3363	231.997	98.8925	0.674296	90.7807	180.889	32.8946	27.5888	116.083
1232.21	8068.43	152.106	117.054	269.16	95.7113	0.629239	112.972	226.635	37.0991	19.8567	138.029
1236.35	8138.02	157.143	113.418	270.561	123.571	0.786356	104.826	203.791	34.25	25.4533	118.176
1240.48	8208.2	202.112	193.84	395.952	207.59	1.0271	290.489	229.608	39.9895	22.1492	117.054
1244.61	8275.61	182.041	79.222	261.264	113.209	0.621884	97.1486	179.733	28.8846	28.3833	99.9451
1248.75	8341.92	169.369	106.896	276.265	128.88	0.760944	131.855	142.947	34.0476	20.7523	68.7736
1252.88	8408.69	207.156	98.338	305.494	114.962	0.554955	85.2847	176.708	27.7661	25.3869	103.174
1257.01	8472.73	252.179	132.534	384.713	173.357	0.687438	194.843	196.408	24.2269	30.1937	113.924
1261.14	8535.62	231.945	112.713	344.658	179.733	0.774895	179	211.417	29.6002	29.1708	119.371
1265.28	8598.87	268.686	129.908	398.595	169.233	0.629853	132.084	210.722	33.4929	30.5224	119.418
1269.41	8659.51	272.737	133.139	405.876	244.777	0.897482	253.771	199.645	33.6806	38.0302	111.788
1273.54	8719.13	174.083	101.724	275.807	94.7258	0.544142	123.879	195.372	33.853	36.8913	125.342
1277.68	8779.19	196.023	175.224	371.247	160.968	0.821169	213.915	167.082	16.3855	27.1926	113.822
1281.81	8836.89	230.583	43.7668	274.349	148.594	0.64443	33.4454	164.831	28.5559	42.8286	96.98
1285.94	8893.73	186.038	111.797	297.834	80.1069	0.430595	28.0317	140.918	14.7809	20.3379	105.22
1290.07	8951.11	231.206	322.418	553.624	266.513	1.15271	167.34	143.695	19.6468	36.1543	92.7115
1294.21	9006.37	241.684	86.3775	328.061	92.8484	0.384173	192.518	151.618	29.488	33.3515	94.6588
1298.34	9060.93	233.221	118.958	352.179	142.822	0.61239	126.962	185.256	20.5512	31.482	83.1847
1302.47	9116.16	269.138	153.72	422.858	189.025	0.702336	153.784	194.568	29.6125	34.3358	90.4927
1306.61	9169.49	176.117	62.8314	238.948	97.0593	0.551108	155.849	186.412	29.5973	46.3025	96.6385
1310.74	9222.28	368.106	218.878	586.984	218.022	0.59228	62.8402	230.972	70.2124	48.9793	140.005
1314.87	9275.86	246.695	118.056	364.751	115.146	0.466752	109.248	205.121	19.7593	35.3757	130.845
1319	9327.73	240.114	157.558	397.672	104.576	0.435525	121.915	201.308	21.7267	29.4063	106.742
1323.14	9379.23	226.368	137.928	364.297	153.642	0.678726	154.492	191.399	22.372	39.0224	122.278
1327.27	9431.65	220.94	191.179	412.119	183.578	0.830896	255.044	207.103	29.5582	44.3595	119.746
1331.4	9482.55	262.254	150.389	412.643	183.57	0.699971	155.606	202.554	17.0502	40.5554	107.516
1335.54	9533.23	286.091	125.29	411.381	209.534	0.732404	143.528	227.787	30.2736	38.5903	121.473
1339.67	9584.96	181.769	94.059	275.828	137.869	0.758486	98.1784	196.393	23.445	33.6912	104.45
1343.8	9635.35	181.923	235.356	417.279	95.4822	0.524849	163.141	167.682	62.3183	31.6497	59.5014
1347.93	9685.68	56.0879	25.9112	81.9991	45.8109	0.81677	43.3461	42.1677	4.37152	10.0578	18.2734
1352.07	9737.22	228.483	98.0662	326.549	190.452	0.833551	203.098	174.09	12.1288	52.1215	94.1817
1356.2	9787.55	230.896	107.211	338.108	138.292	0.598934	93.2892	184.656	23.621	67.8428	90.2647
1360.33	9837.92	177.247	100.646	277.893	87.099	0.4914	119.912	133.681	22.8989	55.1728	69.7332
1364.46	9889.54	158.781	83.5447	242.326	115.083	0.724788	80.7602	100.066	14.7702	40.0819	44.561
1368.6	9939.96	261.091	111.372	372.463	174.491	0.668316	80.668	127.781	17.8404	47.161	70.5956
1372.73	9990.42	254.329	147.809	402.138	172.706	0.679066	115.559	151.807	17.4314	41.2671	65.0165
1376.86	10042.1	242.548	162.85	405.398	211.068	0.870213	114.689	143.7	16.3485	50.3706	50.1203
1381	10092.7	152.978	62.2965	215.274	165.091	1.07919	109.56	121.904	18.1782	47.9999	51.4994
1385.13	10143.2	92.4427	47.358	139.801	8.23771	0.0891115	71.2123	78.898	13.4141	45.9167	50.0716
1389.26	10195	92.2188	51.2551	143.474	80.6351	0.874389	82.1489	104.199	48.7266	71.6476	88.9853
1393.39	10245.7	77.3684	123.516	200.884	102.429	1.32392	104.491	77.7093	11.6708	28.6335	60.0792
1397.53	10296.4	110.756	62.7627	173.518	117.204	1.05823	93.9713	112.517	20.9162	40.7092	98.2375
1401.66	10348.3	93.6515	75.4486	169.1	82.1057	0.876715	84.8449	83.0568	19.7735	45.6431	66.7475
1405.79	10399.1	93.275	157.012	250.287	85.8673	0.920582	109.148	78.71	14.4141	42.6431	49.0501
1409.93	10449.9	64.7465	67.6977	132.444	25.969	0.401087	40.71	81.0397	11.8464	35.1141	48.1065
1414.06	10502	48.9685	147.495	196.463	64.6322	1.31987	119.22	55.1452	11.7934	30.5202	56.291
1418.19	10552.9	83.3213	175.852	259.173	100.158	1.20207	102.087	61.4998	14.3596	33.5518	80.6353
1422.32	10603.8	0	0	0	5.63763	0	0	17.5448	0	0	27.4736
1426.46	10656	51.1016	95.1412	146.243	38.2445	0.748401	93.2473	57.681	17.383	29.4044	97.7164
1430.59	10707	39.919	88.4361	128.355	33.9986	0.85169	108.052	43.3599	13.4337	15.5317	68.7508
1434.72	10758	61.9834	39.1318	101.115	27.3034	0.440495	66.5719	62.7831	52.5249	26.7299	19.5418
1438.86	10810.2	0	0	0	0	0	0	53.1131	0	0	40.0386
1442.99	10861.2	17.4258	17.1392	34.565	9.33758	0.535848	71.4062	33.3291	9.33917	10.758	58.624
1447.12	10912.3	31.1486	107.155	138.304	57.8914	1.85856	185.948	66.8096	29.9061	17.692	71.2607
1451.25	10964.5	37.3536	45.4526	82.8062	17.1528	0.459202	40.9889	30.1636	13.3137	0	27.9917
1455.39	11015.5	26.9679	62.0888	89.0567	40.121	1.48773	64.6695	43.6324	48.3837	2.47142	52.5243
1459.52	11066.6	19.4387	19.9382	39.3769	33.2745	1.71177	45.5092	33.6163	40.6504	0	30.3425
1463.65	11118.8	18.0124	28.4146	46.4269	23.2496	1.29076	47.8601	34.5471	13.9682	6.34709	34.5953
1467.79	11169.9	20.7391	0	20.7391	17.7636	0.856526	63.3276	59.4204	40.1061	0	50.77
1476.05	11273.1	47.6615	160.679	208.341	123.6	2.59328	9.15274	109.765	38.1903	9.43352	62.857
1480.18	11324.2	28.1156	30.5461	58.6617	61.966	2.20397	119.19	53.7638	19.8655	5.11239	69.0644
1484.32	11375.2	56.6325	26.6396	83.2721	71.3408	1.25971	92.5803	89.716	18.9671	6.69028	87.2862
